# Supplementary material for: Prognostic Value of Salivary Biochemical Indicators in Primary Resectable Breast Cancer
Source: MDPI journal article supplement (doi:10.3390/metabo12060552), 2022-06-16
Supplement: s1 [file s1]

**Table S1.** Biochemical composition of the saliva of patients with primary resectable breast cancer and the control group

| №  | Indicator                       | Control Group, n=298   | Breast Cancer, n=355   | p-value |
|----|---------------------------------|------------------------|------------------------|---------|
| 1  | pH                              | 6.49 [6.30; 6.72]      | 6.48 [6.25; 6.71]      | 0.8210  |
| 2  | Calcium, mmol/L                 | 1.27 [1.03; 1.55]      | 1.24 [0.86; 1.65]      | 0.6910  |
| 3  | Phosphorus, mmol/L              | 4.36 [3.31; 5.85]      | 4.61 [3.52; 5.94]      | 0.4550  |
| 4  | Sodium, mmol/L                  | 8.4 [5.6; 12.1]        | 8.1 [4.7; 13.0]        | 0.3636  |
| 5  | Potassium, mmol/L               | 10.8 [8.8; 14.2]       | 11.1 [8.1; 14.3]       | 0.6745  |
| 6  | Chlorides, mmol/L               | 25.5 [20.7; 31.4]      | 25.5 [20.0; 31.8]      | 0.3858  |
| 7  | Magnesium, mmol/L               | 0.296 [0.241; 0.356]   | 0.29 [0.22; 0.38]      | 0.7497  |
| 8  | NO, $\mu\text{mol/L}$           | 22.8 [13.2; 36.8]      | 29.4 [17.4; 43.7]      | 0.0010  |
| 9  | Protein, mg/mL                  | 1.08 [0.65; 1.70]      | 0.64 [0.38; 1.08]      | 0.0000  |
| 10 | Urea, mmol/L                    | 6.66 [4.36; 9.13]      | 9.89 [6.50; 13.94]     | 0.0000  |
| 11 | Uric acid, $\mu\text{mol/L}$    | 85.9 [34.4; 144.5]     | 58.4 [24.2; 127.2]     | 0.0130  |
| 12 | Lactic acid, mmol/L             | 2.32 [1.41; 3.62]      | 2.33 [1.59; 3.38]      | 0.2907  |
| 13 | Pyruvic acid, $\mu\text{mol/L}$ | 12.99 [9.56; 18.14]    | 14.71 [10.29; 19.61]   | 0.0855  |
| 14 | Albumin, mg/mL                  | 0.264 [0.175; 0.442]   | 0.31 [0.18; 0.57]      | 0.0467  |
| 15 | $\alpha$ -Aminoacids, mmol/L    | 4.06 [3.83; 4.32]      | 4.24 [3.90; 4.81]      | 0.0000  |
| 16 | Imidazole compounds, mmol/L     | 0.303 [0.205; 0.410]   | 0.281 [0.190; 0.402]   | 0.0857  |
| 17 | Sialic acids, mmol/L            | 0.183 [0.128; 0.293]   | 0.201 [0.140; 0.275]   | 0.2520  |
| 18 | Seromucoids, c.u.               | 0.091 [0.061; 0.130]   | 0.100 [0.064; 0.163]   | 0.0317  |
| 19 | ALT, U/L                        | 3.85 [2.85; 5.08]      | 4.15 [3.00; 5.69]      | 0.0384  |
| 20 | AST, U/L                        | 5.58 [3.67; 7.50]      | 6.33 [4.50; 8.83]      | 0.0026  |
| 21 | AST/ALT-ratio, c.u.             | 1.40 [1.13; 1.88]      | 1.46 [1.15; 1.94]      | 0.4269  |
| 22 | LDH, U/L                        | 1101.5 [635.7; 1908.0] | 1470.5 [876.7; 2073.0] | 0.0003  |
| 23 | ALP, U/L                        | 60.8 [41.3; 84.7]      | 71.7 [47.8; 106.5]     | 0.0017  |
| 24 | GGT, U/L                        | 20.4 [17.4; 24.4]      | 23.3 [20.0; 26.5]      | 0.0000  |
| 25 | Catalase, nkat/mL               | 4.58 [3.32; 5.79]      | 3.80 [2.60; 5.99]      | 0.0298  |
| 26 | Superoxide dismutase, c.u.      | 57.9 [31.6; 113.2]     | 71.1 [31.6; 147.4]     | 0.1595  |
| 27 | $\alpha$ -Amylase, U/L          | 185.2 [83.5; 384.4]    | 304.9 [151.3; 602.1]   | 0.0007  |
| 28 | Antioxidant activity, mmol/L    | 1.78 [1.48; 2.28]      | 1.67 [1.41; 2.10]      | 0.2647  |
| 29 | Peroxidase, c.u.                | 0.400 [0.170; 0.750]   | 0.440 [0.250; 0.900]   | 0.2897  |
| 30 | Diene conjugates, c.u.          | 3.92 [3.78; 4.07]      | 3.93 [3.72; 4.13]      | 0.5179  |
| 31 | Triene conjugates, c.u.         | 0.893 [0.818; 0.994]   | 0.887 [0.789; 1.013]   | 0.5762  |
| 32 | Schiff bases, c.u.              | 0.545 [0.510; 0.576]   | 0.537 [0.479; 0.671]   | 0.7031  |
| 33 | MDA, $\mu\text{mol/L}$          | 6.50 [5.73; 7.95]      | 7.01 [5.73; 8.97]      | 0.0121  |
| 34 | MM 280/254, c.u.                | 0.839 [0.755; 0.948]   | 0.849 [0.775; 0.948]   | 0.4935  |

**Note.** The description of the sample was made by calculating the median (Me) and interquartile range in the form of the 25th and 75th percentiles [LQ; UQ]. Statistically significant differences between groups are highlighted in red,  $p < 0.05$ .

**Table S2.** Biochemical composition of the saliva of patients with primary resectable breast cancer depending on the presence/absence of relapse

| No | Indicator                    | No relapse, n=292      | Relapse, n=59          | p-value |
|----|------------------------------|------------------------|------------------------|---------|
| 1  | pH                           | 6.48 [6.27; 6.71]      | 6.48 [6.15; 6.75]      | 0.6130  |
| 2  | Calcium, mmol/L              | 1.23 [0.92; 1.64]      | 1.25 [0.82; 1.74]      | 0.8939  |
| 3  | Phosphorus, mmol/L           | 4.58 [3.49; 6.01]      | 4.67 [3.57; 5.62]      | 0.6799  |
| 4  | Sodium, mmol/L               | 8.2 [4.7; 13.1]        | 6.4 [4.9; 10.5]        | 0.4466  |
| 5  | Potassium, mmol/L            | 11.4 [8.0; 14.7]       | 10.3 [8.4; 13.5]       | 0.4105  |
| 6  | Chlorides, mmol/L            | 25.7 [20.2; 32.9]      | 24.9 [19.0; 29.3]      | 0.1745  |
| 7  | Magnesium, mmol/L            | 0.29 [0.23; 0.38]      | 0.28 [0.18; 0.40]      | 0.5108  |
| 8  | NO, $\mu$ mol/L              | 29.5 [17.4; 43.5]      | 27.9 [19.3; 43.9]      | 0.5888  |
| 9  | Protein, mg/mL               | 0.64 [0.38; 1.08]      | 0.58 [0.38; 1.04]      | 0.5278  |
| 10 | Urea, mmol/L                 | 9.96 [6.63; 14.04]     | 9.14 [6.09; 13.14]     | 0.4795  |
| 11 | Uric acid, $\mu$ mol/L       | 60.0 [22.6; 127.8]     | 57.3 [30.4; 125.0]     | 0.8382  |
| 12 | Lactic acid, mmol/L          | 2.30 [1.43; 3.38]      | 2.73 [1.96; 3.44]      | 0.1367  |
| 13 | Pyruvic acid, $\mu$ mol/L    | 14.71 [10.54; 19.36]   | 14.22 [9.80; 20.10]    | 0.8596  |
| 14 | Albumin, mg/mL               | 0.32 [0.18; 0.58]      | 0.28 [0.20; 0.41]      | 0.2346  |
| 15 | $\alpha$ -Aminoacids, mmol/L | 4.23 [3.90; 4.79]      | 4.41 [3.90; 5.10]      | 0.3243  |
| 16 | Imidazole compounds, mmol/L  | 0.281 [0.190; 0.410]   | 0.258 [0.175; 0.357]   | 0.1800  |
| 17 | Sialic acids, mmol/L         | 0.201 [0.140; 0.262]   | 0.220 [0.153; 0.305]   | 0.1571  |
| 18 | Seromucoids, c.u.            | 0.099 [0.062; 0.161]   | 0.106 [0.072; 0.183]   | 0.2283  |
| 19 | ALT, U/L                     | 4.23 [3.00; 5.69]      | 4.08 [3.00; 5.38]      | 0.8830  |
| 20 | AST, U/L                     | 6.33 [4.50; 8.83]      | 6.50 [4.17; 9.08]      | 0.8973  |
| 21 | AST/ALT-ratio, c.u.          | 1.45 [1.13; 1.94]      | 1.57 [1.22; 1.91]      | 0.4319  |
| 22 | LDH, U/L                     | 1477.0 [876.7; 2073.0] | 1420.0 [767.3; 2101.0] | 0.8322  |
| 23 | ALP, U/L                     | 76.1 [48.9; 108.7]     | 60.8 [47.8; 78.2]      | 0.0274  |
| 24 | GGT, U/L                     | 23.4 [20.4; 26.6]      | 22.3 [19.1; 26.3]      | 0.2418  |
| 25 | Catalase, nkat/mL            | 3.80 [2.6; 6.02]       | 3.81 [2.53; 5.83]      | 0.6184  |
| 26 | Superoxide dismutase, c.u.   | 71.1 [31.6; 160.5]     | 65.8 [42.1; 115.8]     | 0.6407  |
| 27 | $\alpha$ -Amylase, U/L       | 297.2 [134.2; 568.0]   | 436.9 [194.7; 670.6]   | 0.1497  |
| 28 | Antioxidant activity, mmol/L | 1.67 [1.41; 2.08]      | 1.78 [1.41; 2.29]      | 0.3266  |
| 29 | Peroxidase, c.u.             | 0.470 [0.250; 0.900]   | 0.380 [0.150; 0.900]   | 0.2476  |
| 30 | Diene conjugates, c.u.       | 3.93 [3.72; 4.17]      | 3.89 [3.70; 4.10]      | 0.2529  |
| 31 | Triene conjugates, c.u.      | 0.882 [0.785; 1.010]   | 0.905 [0.809; 1.016]   | 0.3150  |
| 32 | Schiff bases, c.u.           | 0.536 [0.478; 0.664]   | 0.553 [0.490; 0.688]   | 0.4480  |
| 33 | MDA, $\mu$ mol/L             | 6.92 [5.73; 8.89]      | 7.52 [5.98; 9.06]      | 0.2411  |
| 34 | MM 280/254, c.u.             | 0.847 [0.773; 0.961]   | 0.857 [0.794; 0.932]   | 0.5912  |

**Note.** The description of the sample was made by calculating the median (Me) and interquartile range in the form of the 25th and 75th percentiles [LQ; UQ]. Statistically significant differences between groups are highlighted in red,  $p < 0.05$ .

**Table S3.** Results of univariate Cox proportional hazards regression analysis

| Nº | Indicator                    | $\chi^2$ | $\beta$ | Standard Error | t-value | p-value |
|----|------------------------------|----------|---------|----------------|---------|---------|
| 1  | pH                           | 0.1881   | -0.1339 | 0.3052         | -0.4387 | 0.6609  |
| 2  | Calcium, mmol/L              | 0.4682   | -0.1411 | 0.2095         | -0.6737 | 0.5005  |
| 3  | Phosphorus, mmol/L           | 0.0002   | 0.0007  | 0.0536         | 0.0139  | 0.9889  |
| 4  | Sodium, mmol/L               | 0.0548   | -0.0045 | 0.0195         | -0.2301 | 0.8180  |
| 5  | Potassium, mmol/L            | 0.6793   | 0.0215  | 0.0256         | 0.8388  | 0.4016  |
| 6  | Chlorides, mmol/L            | 0.3558   | -0.0066 | 0.0115         | -0.5780 | 0.5633  |
| 7  | Magnesium, mmol/L            | 0.2660   | 0.5490  | 1.058          | 0.5188  | 0.6039  |
| 8  | NO, $\mu$ mol/L              | 0.0251   | 0.0005  | 0.0034         | 0.1606  | 0.8724  |
| 9  | Protein, mg/mL               | 0.6972   | -0.1384 | 0.1717         | -0.8057 | 0.4204  |
| 10 | Urea, mmol/L                 | 0.8464   | 0.0198  | 0.0212         | 0.9345  | 0.3500  |
| 11 | Uric acid, $\mu$ mol/L       | 0.0007   | -0.0001 | 0.0013         | -0.0263 | 0.9790  |
| 12 | Lactic acid, mmol/L          | 0.1221   | 0.0214  | 0.0586         | 0.3652  | 0.7150  |
| 13 | Pyruvic acid, $\mu$ mol/L    | 1.007    | -0.0155 | 0.0160         | -0.9656 | 0.3342  |
| 14 | Albumin, mg/mL               | 2.017    | -0.5810 | 0.4336         | -1.340  | 0.1803  |
| 15 | $\alpha$ -Aminoacids, mmol/L | 0.0012   | 0.0032  | 0.0911         | 0.0351  | 0.9720  |
| 16 | Imidazole compounds, mmol/L  | 0.9717   | -0.5979 | 0.6602         | -0.9058 | 0.3651  |
| 17 | Sialic acids, mmol/L         | 0.1215   | 0.1932  | 0.5310         | 0.3639  | 0.7159  |
| 18 | Seromucoids, c.u.            | 0.1551   | 0.5795  | 1.452          | 0.3990  | 0.6899  |
| 19 | ALT, U/L                     | 2.422    | -0.0040 | 0.0027         | -1.476  | 0.1399  |
| 20 | AST, U/L                     | 3.761    | 0.0134  | 0.0056         | 2.396   | 0.0166  |
| 21 | AST/ALT-ratio, c.u.          | 1.372    | -0.2243 | 0.1995         | -1.124  | 0.2608  |
| 22 | LDH, U/L                     | 0.0081   | 0.0001  | 0.0001         | 0.0901  | 0.9282  |
| 23 | ALP, U/L                     | 6.378    | 0.0170  | 0.0048         | 3.525   | 0.0004  |
| 24 | GGT, U/L                     | 0.0304   | -0.0037 | 0.0212         | -0.1733 | 0.8625  |
| 25 | Catalase, nkat/mL            | 0.4194   | -0.0001 | 0.0001         | -0.6419 | 0.5210  |
| 26 | Superoxide dismutase, c.u.   | 0.1253   | -0.0003 | 0.0009         | -0.3463 | 0.7291  |
| 27 | $\alpha$ -Amylase, U/L       | 0.8597   | 0.0004  | 0.0004         | 0.9787  | 0.3278  |
| 28 | Antioxidant activity, mmol/L | 0.0135   | 0.0441  | 0.3786         | 0.1164  | 0.9073  |
| 29 | Peroxidase, c.u.             | 0.7713   | -0.3223 | 0.3996         | -0.8064 | 0.4200  |
| 30 | Diene conjugates, c.u.       | 3.361    | -0.7207 | 0.3973         | -1.814  | 0.0697  |
| 31 | Triene conjugates, c.u.      | 1.422    | 0.7208  | 0.5752         | 1.253   | 0.2102  |
| 32 | Schiff bases, c.u.           | 1.602    | 0.8465  | 0.6273         | 1.349   | 0.1772  |
| 33 | MDA, $\mu$ mol/L             | 0.0082   | -0.0044 | 0.0491         | -0.903  | 0.9281  |
| 34 | MM 280/254, c.u.             | 0.0057   | -0.0514 | 0.6831         | -0.0752 | 0.9400  |

**Table S4.** Results of multivariate survival analysis using the Cox regression model for biochemical indicators of saliva only ( $\chi^2 = 14.19$ ,  $p=0.00266$ )

| Indicator              | $\beta$ | Standard - Error | t-value | p-value |
|------------------------|---------|------------------|---------|---------|
| ALP, U/L               | 0.0229  | 0.0060           | 3.802   | 0.0001  |
| Diene conjugates, c.u. | -0.0063 | 0.0030           | -2.103  | 0.0355  |
| AST, U/L               | -0.5458 | 0.3833           | -1.424  | 0.1545  |
